# Supplementary material for: A programmable pAgo nuclease with universal guide and target specificity from the mesophilic bacterium Kurthia massiliensis
Source: PubMed Central journal article supplement — Nucleic Acids Res. 2021 Mar 21;49(7):4054–65. doi: 10.1093/nar/gkab182 (PMC8053121; doi:10.1093/nar/gkab182), 2021-03-21
Supplement: gkab182_supplemental_file.pdf [file gkab182_supplemental_file.pdf]

# A programmable pAgo nuclease with universal guide and target specificity from the mesophilic bacterium *Kurthia massiliensis*

Ekaterina Kropocheva, Anton Kuzmenko, Alexei A. Aravin, Daria Esyunina, Andrey Kulbachinskiy

## Supplementary Information

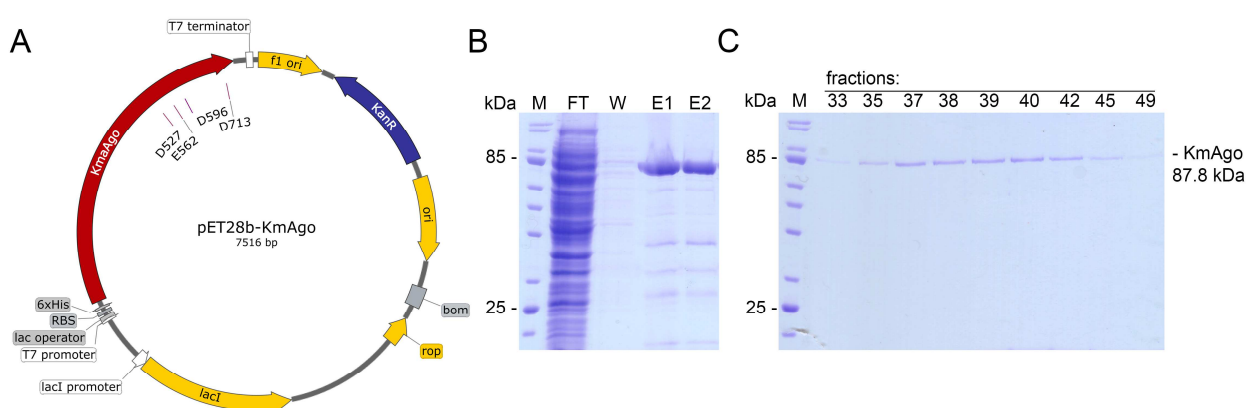

**Fig. S1. Purification of KmAgo from *E. coli* cells.** (A) Scheme of the expression plasmid. Positions of the catalytic tetrad residues in KmAgo are shown. (B) The first purification step by  $\text{Co}^{2+}$ -affinity chromatography. M, molecular weight marker; FT, flowthrough fraction; W, washing step with buffer containing 20 mM imidazole; E1 and E2 – elution fractions. (C) The second purification step by Heparin affinity chromatography (Coomassie staining). Fraction numbers after elution with a 0.1-1.0 M NaCl gradient. The position of KmAgo is indicated.

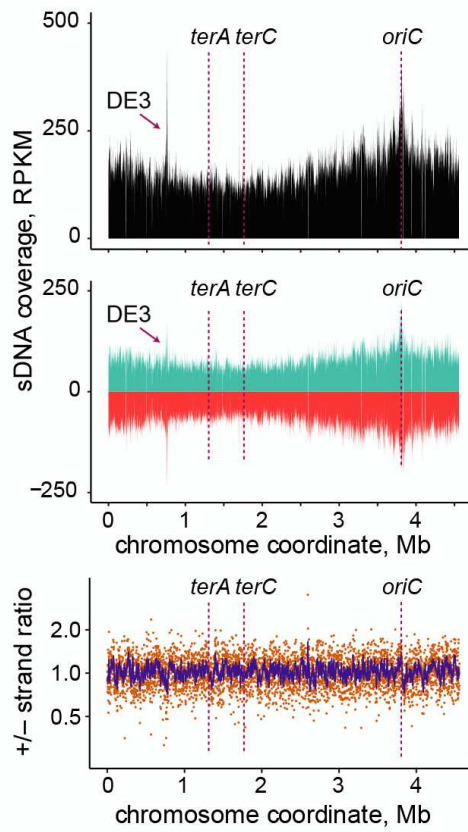

**Fig. S2. Second replica of KmAgo-associated smDNAs mapping to the chromosome of *E. coli* BL21(DE3).** Positions of the origin of replication (*oriC*) and replication termination sites (*terA* and *terC*) are indicated along the chromosomal coordinate. SmDNA coverage is shown in RPKM.

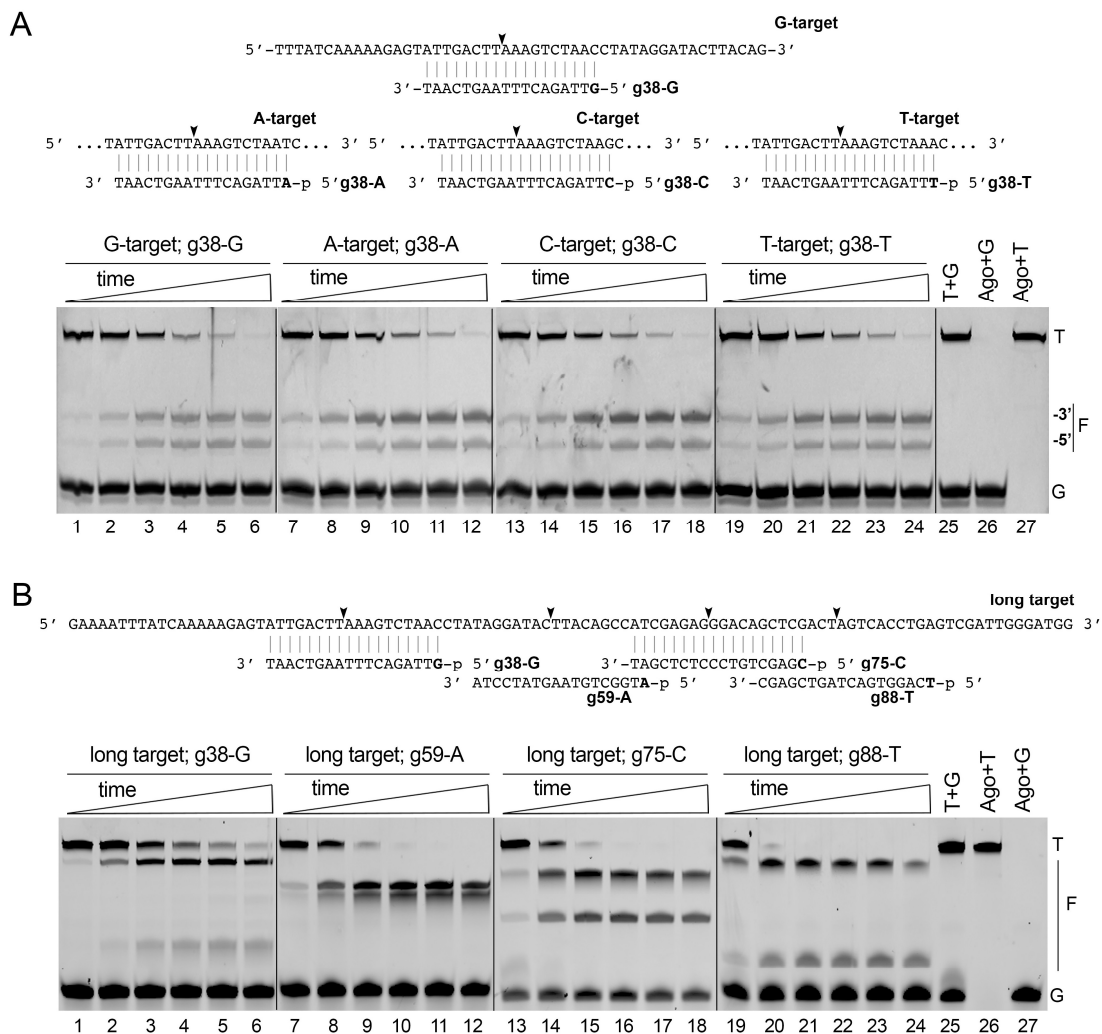

**Fig. S3. Analysis of single-stranded DNA cleavage by KmAgo loaded with various guide DNA sequences.** (A) Kinetics of cleavage of the 50 nt target by KmAgo loaded with guide DNAs containing different 5'-nucleotides (G, A, C, and T) and corresponding to the same target site. The scheme of the target and guide DNAs is shown on the top. (B) Kinetics of cleavage of a longer target variant (shown on the top) with guide DNAs containing different 5'-nucleotides and corresponding to different target sites. Note that the rate of the reaction with the '-38' guide DNA is somewhat lower than in the case of other guide molecules. Positions of the target (T), guide (G) molecules and the cleavage fragments (F) are indicated.

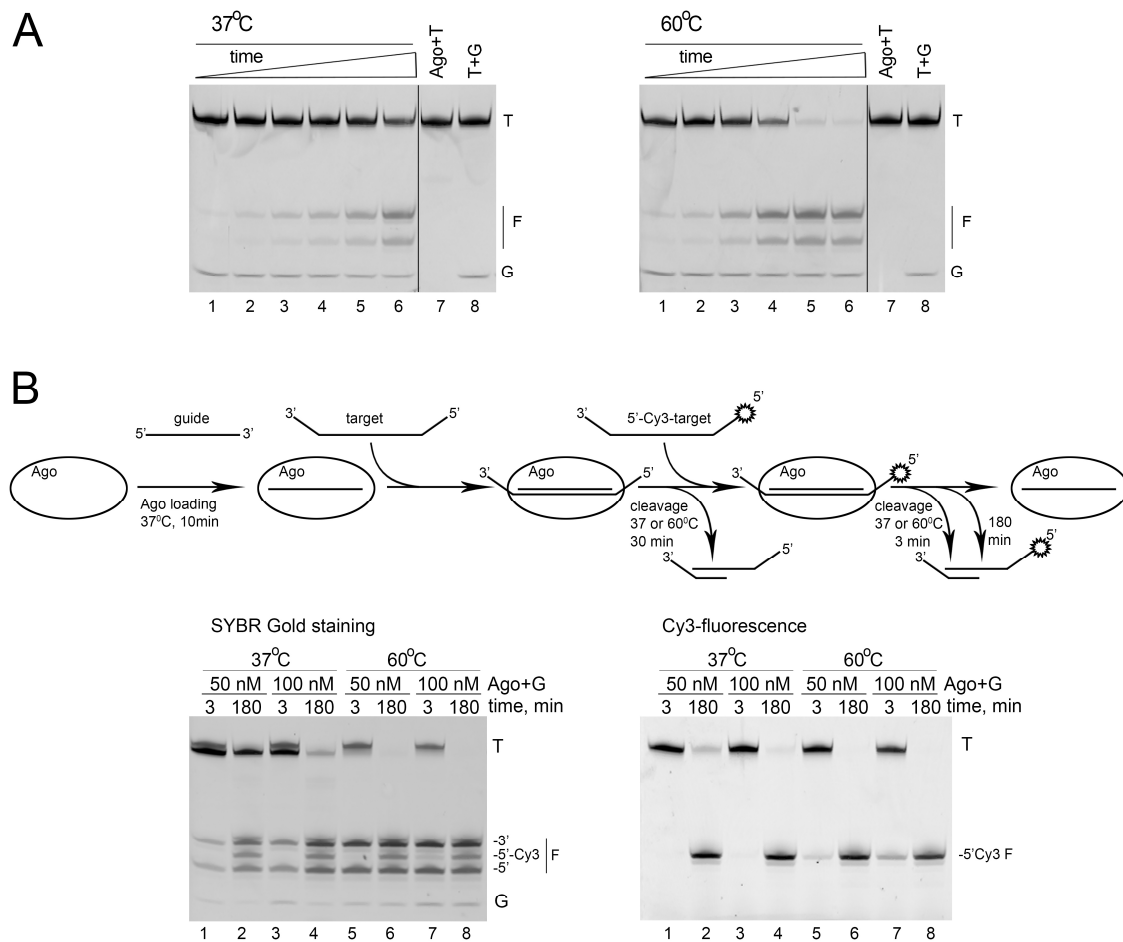

**Fig. S4. Multiple turnover DNA cleavage by KmAgo.** (A) Comparison of the kinetics of target DNA cleavage by KmAgo at different temperatures. KmAgo (100 nM) pre-loaded with guide DNA (100 nM) was incubated with target DNA (200 nM) at 37 °C (left panel) or 60 °C (right panel) for indicated time intervals. (B) Experiments on two-step target DNA cleavage. KmAgo (50 nM or 100 nM) pre-loaded with equimolar amounts of guide DNA was incubated with unlabeled target DNA (200 nM) for 30 min at 37 °C, followed by the addition of identical 3'-Cy3-labeled target DNA (200 nM). The reactions were stopped after 3 minutes or 3 hours, separated by denaturing PAGE and visualized by SYBR Gold staining (left) or Cy3 fluorescence scanning (right). Positions of the target (T), guide (G) molecules and cleavage fragments (F) are indicated. After 3 minutes at 37 °C, only the first unlabeled DNA target is cleaved (lanes 1,3, with no Cy3-labeled products visible on lanes 9,11). At 60 °C initial cleavage of the Cy3-labeled target is also visible (lanes 13,15). After 3 hours, the Cy3-containing target is cleaved with high efficiency at both temperatures (lanes 10,12,14 and 16).

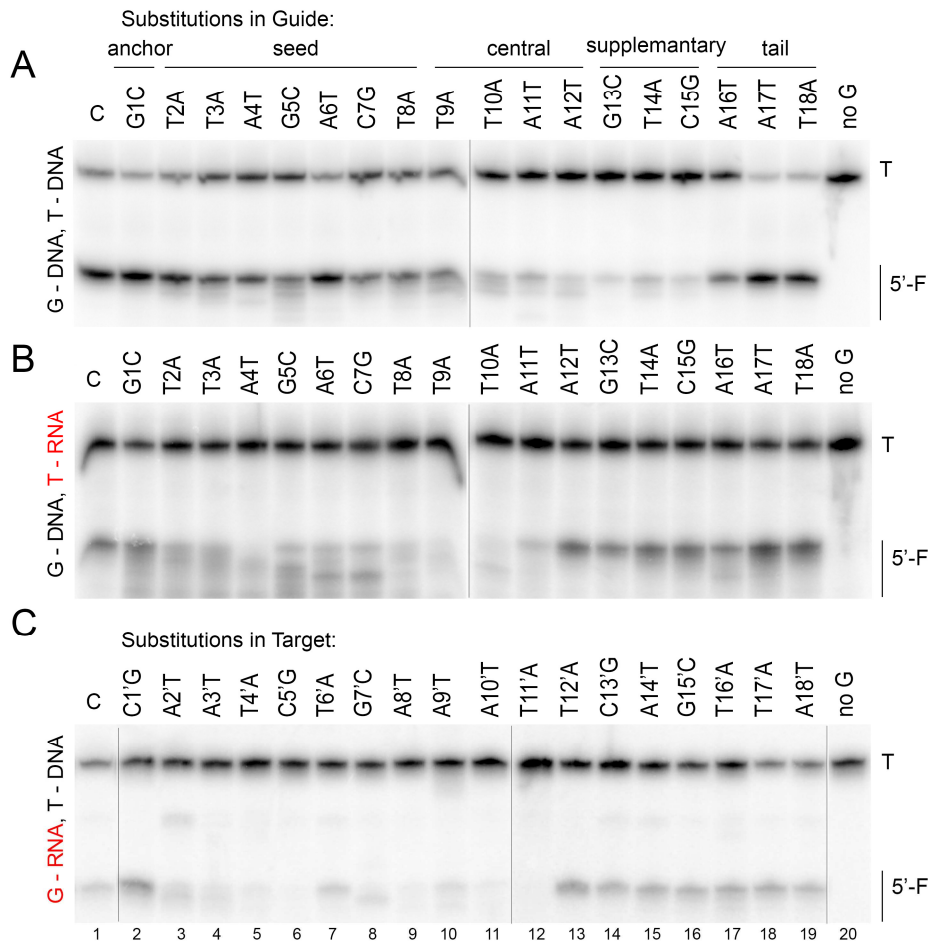

**Fig. S5. Reproducibility of the target DNA or RNA cleavage by KmAgo with mismatched guide molecules.** A replica of the experiment from Fig. 4 is shown.

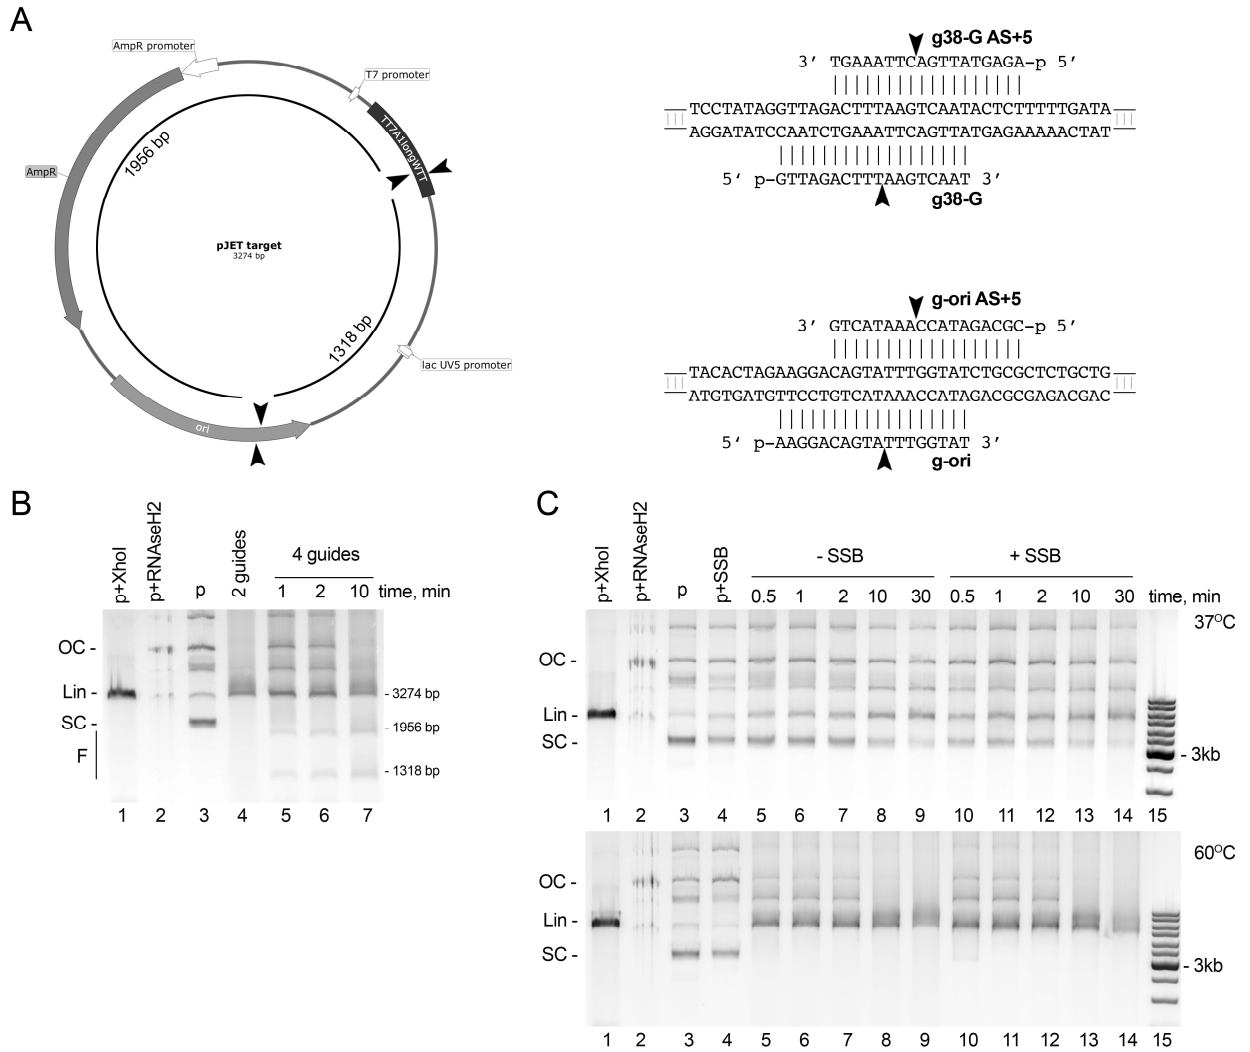

**Fig. S6. Cleavage of plasmid DNA by KmAgo.** (A) Scheme of the pJET1.2 target plasmid used in the cleavage assay. The plasmid contained a 300 bp insert shown in black (insert 2 in Table S1). The sites of cleavage in each strand and the lengths of resulting fragments are indicated. The sequences of the target regions and corresponding pairs of guides are shown on the right. (B) Plasmid cleavage with one or two pairs of guides corresponding to the two target sites in the plasmid. Positions of supercoiled (SC), relaxed open circle (OC), linear (Lin) plasmid forms, and the cleavage fragments (F; 1956 bp and 1318 bp) are indicated. (C) Effects of SSB on plasmid cleavage by KmAgo at 37 °C (top) and 60 °C (bottom). The reactions were performed with two DNA guides, gS0 and gAS+5, corresponding to the Amp resistance gene (see Fig. 5A and Table S1). The kinetics of cleavage was measured either in the absence (lanes 5-9) or in the presence (lanes 10-14) of SSB proteins. *E. coli* SSB (top) or thermostable ET SSB (bottom) were first incubated at 10  $\mu$ M concentration with 20 nM target plasmid for 10 minutes at corresponding temperatures. Then the samples were mixed with guide-loaded KmAgo to the 1  $\mu$ M, 2 nM and 500 nM final concentrations of SSB, plasmid and guides/KmAgo, respectively, and incubated for indicated time intervals at the same temperatures.

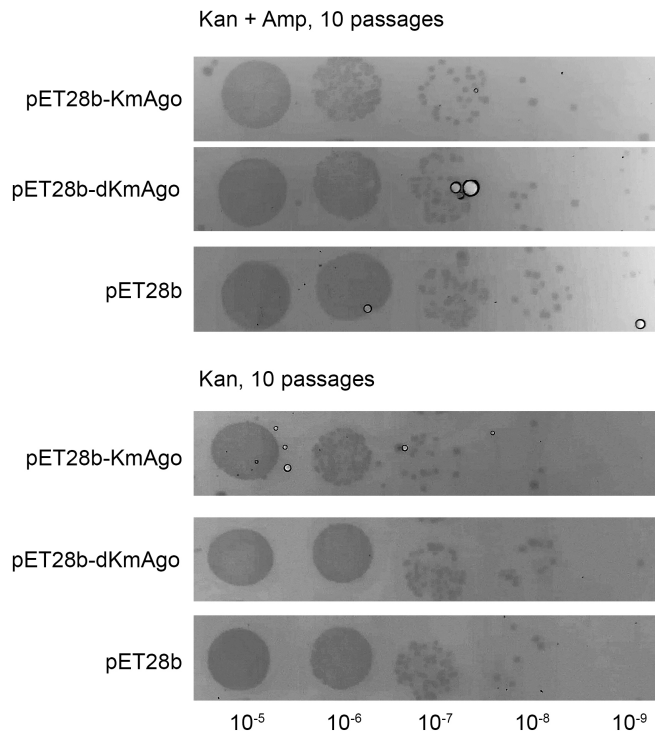

**Fig. S7. Effects of KmAgo on plasmid loss.** *E. coli* BL21(DE3) were co-transformed with pSRKAmp (Amp<sup>R</sup>) and pET28b-KmAgo or pET28b-dKmAgo (catalytically dead Ago) or empty vector pET28b (Kan<sup>R</sup>). The cells were cultivated in the LB medium with 50 µg/ml kanamycin and 0.2 mM IPTG in the absence of ampicillin (to allow the loss of the pSRKAmp plasmid) or with kanamycin, IPTG and 200 µg/ml ampicillin (for control) at 18°C during 10 passages. The duration of each passage was 24 h; after 24 h the cells were diluted 1:100 in the fresh LB medium with IPTG and antibiotics. After the final passage, serial dilutions of bacterial cultures were plated on agar LB dishes with kanamycin and ampicillin to compare the number of cells containing both plasmids and incubated at 37 °C overnight. No differences could be seen between the cultures that were grown with and without ampicillin.

**Table S1. Sequences of oligonucleotides.**

| Oligonucleotide name | Sequence (5'-3')                                                                                 | Description                                              |
|----------------------|--------------------------------------------------------------------------------------------------|----------------------------------------------------------|
| 1. g38-G             | GTTAGACTTTAAGTCAAT                                                                               | 18 nt guide, forms 5'-G pair with G-target               |
| 2. G-target          | TTTATCAAAAAGAGTATTGACTTAAAG<br>TCTAACCTATAGGATACTTACAG                                           | 50 nt target DNA for g38-G                               |
| 3. g38-G-RNA         | GUUAGACUUUAAGUCAAU                                                                               | 18 nt RNA guide for the guide/target specificity assay   |
| 4. G-target-RNA      | UUUAUCAAAAAGAGUAUUGACUUAA<br>AGUCUAACCUAUAGGAUACUUACAG                                           | 50 nt RNA target for the guide/target specificity assay  |
| 5. g38-10nt          | GTTAGACTTT                                                                                       | 10 nt guide, forms 5'-G pair with G-target               |
| 6. g38-12nt          | GTTAGACTTTAA                                                                                     | 12 nt guide, forms 5'-G pair with G-target               |
| 7. g38-14nt          | GTTAGACTTTAAGT                                                                                   | 14 nt guide, forms 5'-G pair with G-target               |
| 8. g38-16nt          | GTTAGACTTTAAGTCA                                                                                 | 16 nt guide, forms 5'-G pair with G-target               |
| 9. g38-20nt          | GTTAGACTTTAAGTCAATAC                                                                             | 20 nt guide, forms 5'-G pair with G-target               |
| 10. g38-22nt         | GTTAGACTTTAAGTCAATACTC                                                                           | 22 nt guide, forms 5'-G pair with G-target               |
| 11. g38_mm1          | <u>C</u> TTAGACTTTAAGTCAAT                                                                       | guide forms mismatched pair in position 1 with G-target  |
| 12. g38_mm2          | G <u>A</u> TAGACTTTAAGTCAAT                                                                      | guide forms mismatched pair in position 2 with G-target  |
| 13. g38_mm3          | G <u>T</u> AAGACTTTAAGTCAAT                                                                      | guide forms mismatched pair in position 3 with G-target  |
| 14. g38_mm4          | G <u>T</u> T <u>I</u> GACTTTAAGTCAAT                                                             | guide forms mismatched pair in position 4 with G-target  |
| 15. g38_mm5          | G <u>T</u> T <u>A</u> C <u>A</u> CTTTAAGTCAAT                                                    | guide forms mismatched pair in position 5 with G-target  |
| 16. g38_mm6          | G <u>T</u> T <u>A</u> G <u>T</u> C <u>T</u> TTAAGTCAAT                                           | guide forms mismatched pair in position 6 with G-target  |
| 17. g38_mm7          | G <u>T</u> T <u>A</u> G <u>A</u> G <u>T</u> TTAAGTCAAT                                           | guide forms mismatched pair in position 7 with G-target  |
| 18. g38_mm8          | G <u>T</u> T <u>A</u> G <u>A</u> C <u>A</u> TTAAGTCAAT                                           | guide forms mismatched pair in position 8 with G-target  |
| 19. g38_mm9          | G <u>T</u> T <u>A</u> G <u>A</u> C <u>T</u> <u>A</u> TTAAGTCAAT                                  | guide forms mismatched pair in position 9 with G-target  |
| 20. g38_mm10         | G <u>T</u> T <u>A</u> G <u>A</u> C <u>T</u> <u>T</u> <u>A</u> AAGTCAAT                           | guide forms mismatched pair in position 10 with G-target |
| 21. g38_mm11         | G <u>T</u> T <u>A</u> G <u>A</u> C <u>T</u> <u>T</u> <u>T</u> <u>I</u> AGTCAAT                   | guide forms mismatched pair in position 11 with G-target |
| 22. g38_mm12         | G <u>T</u> T <u>A</u> G <u>A</u> C <u>T</u> <u>T</u> <u>T</u> <u>A</u> T <u>G</u> TCAAT          | guide forms mismatched pair in position 12 with G-target |
| 23. g38_mm13         | G <u>T</u> T <u>A</u> G <u>A</u> C <u>T</u> <u>T</u> <u>T</u> <u>A</u> C <u>T</u> CAAT           | guide forms mismatched pair in position 13 with G-target |
| 24. g38_mm14         | G <u>T</u> T <u>A</u> G <u>A</u> C <u>T</u> <u>T</u> <u>T</u> <u>A</u> G <u>A</u> C <u>A</u> AT  | guide forms mismatched pair in position 14 with G-target |
| 25. g38_mm15         | G <u>T</u> T <u>A</u> G <u>A</u> C <u>T</u> <u>T</u> <u>T</u> <u>A</u> A <u>G</u> T <u>G</u> AAT | guide forms mismatched pair in position 15 with G-target |



|                    |                                                        |                                                          |
|--------------------|--------------------------------------------------------|----------------------------------------------------------|
| 26. g38_mm16       | GTTAGACTTTAAGTCIAT                                     | guide forms mismatched pair in position 16 with G-target |
| 27. g38_mm17       | GTTAGACTTTAAGTCATT                                     | guide forms mismatched pair in position 17 with G-target |
| 28. g38_mm18       | GTTAGACTTTAAGTCAA                                      | guide forms mismatched pair in position 18 with G-target |
| 29. G-target_mm1'  | TTTATCAAAAAGAGTATTGACTTAAAG<br>TCTAAGCTATAGGATACTTACAG | target forms mismatched pair in position 1 of g38 guide  |
| 30. G-target_mm2'  | TTTATCAAAAAGAGTATTGACTTAAAG<br>TCTATCCTATAGGATACTTACAG | target forms mismatched pair in position 2 of g38 guide  |
| 31. G-target_mm3'  | TTTATCAAAAAGAGTATTGACTTAAAG<br>TCTIACCTATAGGATACTTACAG | target forms mismatched pair in position 3 of g38 guide  |
| 32. G-target_mm4'  | TTTATCAAAAAGAGTATTGACTTAAAG<br>TCAAACCTATAGGATACTTACAG | target forms mismatched pair in position 4 of g38 guide  |
| 33. G-target_mm5'  | TTTATCAAAAAGAGTATTGACTTAAAG<br>TGTAACCTATAGGATACTTACAG | target forms mismatched pair in position 5 of g38 guide  |
| 34. G-target_mm6'  | TTTATCAAAAAGAGTATTGACTTAAAG<br>ACTAACCTATAGGATACTTACAG | target forms mismatched pair in position 6 of g38 guide  |
| 35. G-target_mm7'  | TTTATCAAAAAGAGTATTGACTTAAAG<br>TCTAACCTATAGGATACTTACAG | target forms mismatched pair in position 7 of g38 guide  |
| 36. G-target_mm8'  | TTTATCAAAAAGAGTATTGACTTAAAG<br>TCTAACCTATAGGATACTTACAG | target forms mismatched pair in position 8 of g38 guide  |
| 37. G-target_mm9'  | TTTATCAAAAAGAGTATTGACTTAAAG<br>TCTAACCTATAGGATACTTACAG | target forms mismatched pair in position 9 of g38 guide  |
| 38. G-target_mm10' | TTTATCAAAAAGAGTATTGACTTAAAG<br>TCTAACCTATAGGATACTTACAG | target forms mismatched pair in position 10 of g38 guide |
| 39. G-target_mm11' | TTTATCAAAAAGAGTATTGACTTAAAG<br>TCTAACCTATAGGATACTTACAG | target forms mismatched pair in position 11 of g38 guide |
| 40. G-target_mm12' | TTTATCAAAAAGAGTATTGACTTAAAG<br>TCTAACCTATAGGATACTTACAG | target forms mismatched pair in position 12 of g38 guide |
| 41. G-target_mm13' | TTTATCAAAAAGAGTATTGACTTAAAG<br>TCTAACCTATAGGATACTTACAG | target forms mismatched pair in position 13 of g38 guide |
| 42. G-target_mm14' | TTTATCAAAAAGAGTATTGACTTAAAG<br>TCTAACCTATAGGATACTTACAG | target forms mismatched pair in position 14 of g38 guide |
| 43. G-target_mm15' | TTTATCAAAAAGAGTATTGACTTAAAG<br>TCTAACCTATAGGATACTTACAG | target forms mismatched pair in position 15 of g38 guide |
| 44. G-target_mm16' | TTTATCAAAAAGAGTATTGACTTAAAG<br>TCTAACCTATAGGATACTTACAG | target forms mismatched pair in position 16 of g38 guide |
| 45. G-target_mm17' | TTTATCAAAAAGAGTATTGACTTAAAG<br>TCTAACCTATAGGATACTTACAG | target forms mismatched pair in position 17 of g38 guide |
| 46. G-target_mm18' | TTTATCAAAAAGAGTATTGACTTAAAG<br>TCTAACCTATAGGATACTTACAG | target forms mismatched pair in position 18 of g38 guide |
| 47. gAS-45         | TGATAACACTGCGGCCAA                                     | guide for plasmid pJET cleavage                          |
| 48. gAS-25         | AGTGCTGCCATAACCATG                                     | guide for plasmid pJET cleavage                          |
| 49. gAS-20         | TATGCAGTGCTGCCATAA                                     | guide for plasmid pJET cleavage                          |
| 50. gAS-15         | AGAATTATGCAGTGCTGC                                     | guide for plasmid pJET cleavage                          |
| 51. gAS-10         | ACTGCATAATTCTCTTAC                                     | guide for plasmid pJET cleavage                          |
| 52. gAS-5          | TGACAGTAAGAGAATTAT                                     | guide for plasmid pJET cleavage                          |

|                  |                                                                                                                    |                                                        |
|------------------|--------------------------------------------------------------------------------------------------------------------|--------------------------------------------------------|
| 53. gS0          | TCTCTTACTGTCATGCCA                                                                                                 | guide for plasmid pJET cleavage                        |
| 54. gAS0         | TGGCATGACAGTAAGAGA                                                                                                 | guide for plasmid pJET cleavage                        |
| 55. gAS+5        | ACGGATGGCATGACAGTA                                                                                                 | guide for plasmid pJET cleavage                        |
| 56. gAS+10       | ATCTTACGGATGGCATGA                                                                                                 | guide for plasmid pJET cleavage                        |
| 57. gAS+15       | AAAGCATCTTACGGATGG                                                                                                 | guide for plasmid pJET cleavage                        |
| 58. gAS+20       | ACAGAAAAGCATCTTACG                                                                                                 | guide for plasmid pJET cleavage                        |
| 59. gAS+25       | CAGTCACAGAAAAGCATC                                                                                                 | guide for plasmid pJET cleavage                        |
| 60. gAS+45       | ATACACTATTCTCAGAAT                                                                                                 | guide for plasmid pJET cleavage                        |
| 61. 6S-1         | GCGAACATCTCAGAGAA                                                                                                  | guide for 6S RNA cleavage                              |
| 62. 6S-2         | ATGAAATATCGGCTCAG                                                                                                  | guide for 6S RNA cleavage                              |
| 63. 6S-3         | TTGTGGTATGAAATATC                                                                                                  | guide for 6S RNA cleavage                              |
| 64. 6S-4         | CACATTCTTGTGGTATG                                                                                                  | guide for 6S RNA cleavage                              |
| 65. 6S-5         | TCTCGGACGGACCGAGC                                                                                                  | guide for 6S RNA cleavage                              |
| 66. 6S-6         | AATGTGTCGTCGCAGTT                                                                                                  | guide for 6S RNA cleavage                              |
| 67. 6S-7         | TCAAGGTGAATGTGTCG                                                                                                  | guide for 6S RNA cleavage                              |
| 68. 6S-8         | GCTGTAACCCTTGAACC                                                                                                  | guide for 6S RNA cleavage                              |
| 69. 6S-9         | CGCAGGCTGTAACCCTT                                                                                                  | guide for 6S RNA cleavage                              |
| 70. 6S-10        | CGCCGCAGGCTGTAACC                                                                                                  | guide for 6S RNA cleavage                              |
| 71. KmAgo-NdeI   | GCGCCCGCTAGCATGGAAGCTTATAT<br>AACAGAAATGGTCTCAC                                                                    | primer for cloning the KmAgo gene into pET28b          |
| 72. KmAgo-XhoI   | GCGCCCTCGAGTTAAACGAATGGC<br>AAGTTCGTCTGATT                                                                         | primer for cloning the KmAgo gene into pET28b          |
| 73. T-target_Cy3 | Cy3-<br>TTTATCAAAAAGAGTATTGACTTAAAG<br>TCTAAACTATAGGATACTTACAG                                                     | 50nt fluorescently labelled target DNA for g38-T guide |
| 74. long target  | GAAAATTTATCAAAAAGAGTATTGACT<br>TAAAGTCTAACCTATAGGATACTTACA<br>GCCATCGAGAGGGACAGCTCGACTA<br>GTCACCTGAGTCGATTGGGATGG | 102 nt target for g38-G, g59-A, g75-C, g88-T guides    |
| 75. g59-A        | ATGGCTGTAAGTATCCTA                                                                                                 | 5'-A guide for long target                             |
| 76. g75-C        | CGAGCTGTCCCTCTCGAT                                                                                                 | 5'-C guide for long target                             |
| 77. g88-T        | CGAGCTGTCCCTCTCGAT                                                                                                 | 5'-T guide for long target                             |
| 78. g38-C        | CTTAGACTTTAAGTCAAT                                                                                                 | 5'-C guide for C-target                                |
| 79. g38-A        | ATTAGACTTTAAGTCAAT                                                                                                 | 5'-A guide for A-target                                |
| 80. g38-T        | TTTAGACTTTAAGTCAAT                                                                                                 | 5'-T guide for T-target                                |
| 81. C-target     | TTTATCAAAAAGAGTATTGACTTAAAG<br>TCTAAGCTATAGGATACTTACAG                                                             | 50 nt target DNA for g38-C guide                       |
| 82. A-target     | TTTATCAAAAAGAGTATTGACTTAAAG<br>TCTAATCTATAGGATACTTACAG                                                             | 50 nt target DNA for g38-A guide                       |

|                   |                                                                                                                                                                                                                                                                                                                                               |                                                                                                                                  |
|-------------------|-----------------------------------------------------------------------------------------------------------------------------------------------------------------------------------------------------------------------------------------------------------------------------------------------------------------------------------------------|----------------------------------------------------------------------------------------------------------------------------------|
| 79. T-target      | TTTATCAAAAAGAGTATTGACTTAAAG<br>TCTAAACTATAGGATACTTACAG                                                                                                                                                                                                                                                                                        | 50nt target DNA for g38-T<br>guide                                                                                               |
| 80. g38-G AS+5    | AGAGTATTGACTTAAAGT                                                                                                                                                                                                                                                                                                                            | guide for plasmid pJET-target<br>cleavage                                                                                        |
| 81. g-ori         | AAGGACAGTATTTGGTAT                                                                                                                                                                                                                                                                                                                            | guide for plasmid pJET-target<br>cleavage                                                                                        |
| 82. g-ori AS+5    | CGCAGATACCAAATACTG                                                                                                                                                                                                                                                                                                                            | guide for plasmid pJET-target<br>cleavage                                                                                        |
| 83. pJET insert 1 | GATCTTTAAGAAGGAGATATACCATG<br>CACCACCACCATCATCATCACCACGG<br>TGGAGGTAGCGGAGGAGGTAGCTGG<br>AACTGCA                                                                                                                                                                                                                                              | sequence of the insert in<br>pJET1.2 (CloneJET PCR<br>Cloning Kit, Thermo Fisher<br>Scientific) used in experiments<br>in Fig. 5 |
| 84. pJET insert 2 | AAAAAAAAAACCCTGTCAGG<br>GGCGGGGTTTTTTTTGTAAAACGAC<br>GGCCAGTGAAGCTTCGAGCTCGGTA<br>CCGACTCAGGTGACTAGTCGAGCGA<br>TTACCAGCAGGCCTGTTATTAGCGAT<br>CCAGATCCAGAACCCGGACCCCGGT<br>GTCGATTGGGATGGCTATTCGCCGT<br>GTCCCTCTCGATGGCTGTAAGTATCC<br>TATAGGTTAGACTTTAAGTCAATACTC<br>TTTTTGATAAATTTTCGGGATCTGGAT<br>CCAAATAGAATTCAGTAAAAA<br>CCCCGCCGAAGCGGGGT | sequence of the insert in<br>pJET1.2 used in experiments<br>in Fig. S6                                                           |
